# Supplementary material for: Immune Milieu and Genomic Alterations Set the Triple-Negative Breast Cancer Immunomodulatory Subtype Tumor Behavior
Source: MDPI journal article supplement (doi:10.3390/cancers13246256), 2021-12-13
Supplement: s1 [file s1]

## Supplementary Materials

# Immune Milieu and Genomic Alterations Set the Triple-Negative Breast Cancer Immunomodulatory Subtype Tumor Behavior

Rubén Rodríguez-Bautista, Claudia H. Caro-Sánchez, Paula Cabrera-Galeana, Gerardo J. Alanis-Funes, Everardo Gutierrez-Millán, Santiago Ávila-Ríos, Margarita Matías-Florentino, Gustavo Reyes-Terán, José Díaz-Chávez, Cynthia Villarreal-Garza, Norma Y. Hernandez-Pedro, Alette Ortega-Gómez, Luis Lara-Mejía, Claudia Rangel-Escareño and Oscar Arrieta

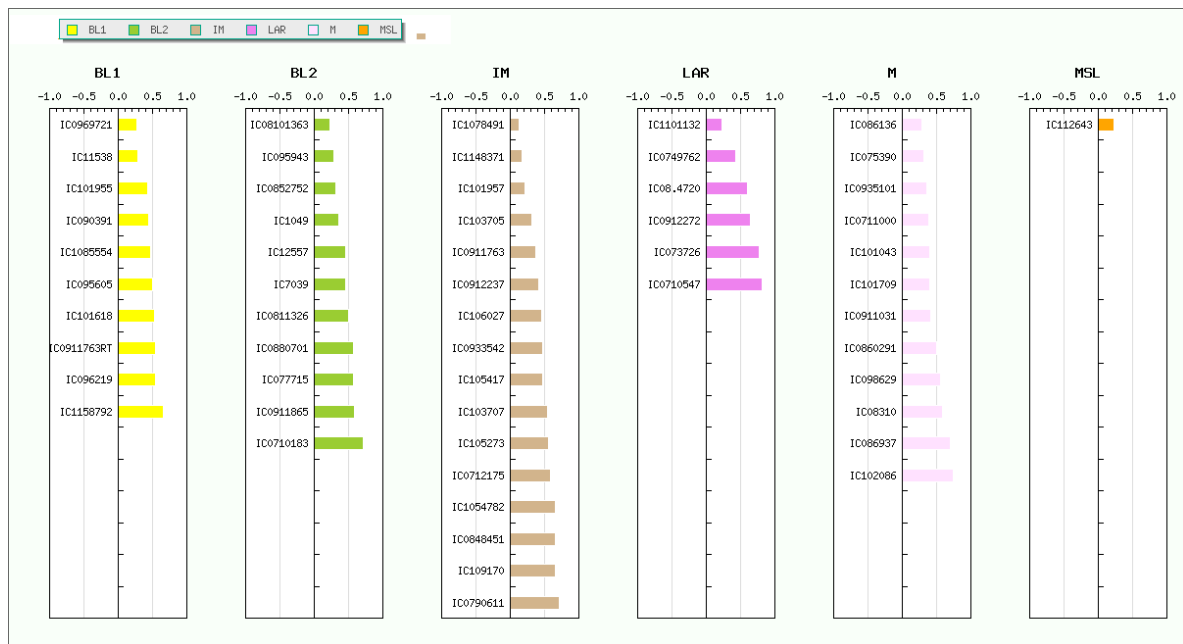

**Figure S1.** Distributions of the Vanderbilt subtypes in Mexican women with triple-negative breast cancer (TNBC) ( $n = 68$ ): basal-like 1 (BL1), basal-like 2 (BL2), immunomodulatory (IM), luminal androgen receptor (LAR), mesenchymal (M), and mesenchymal stem-like (MSL). Another 11 samples could not be identified by this software with a significant confidence level.

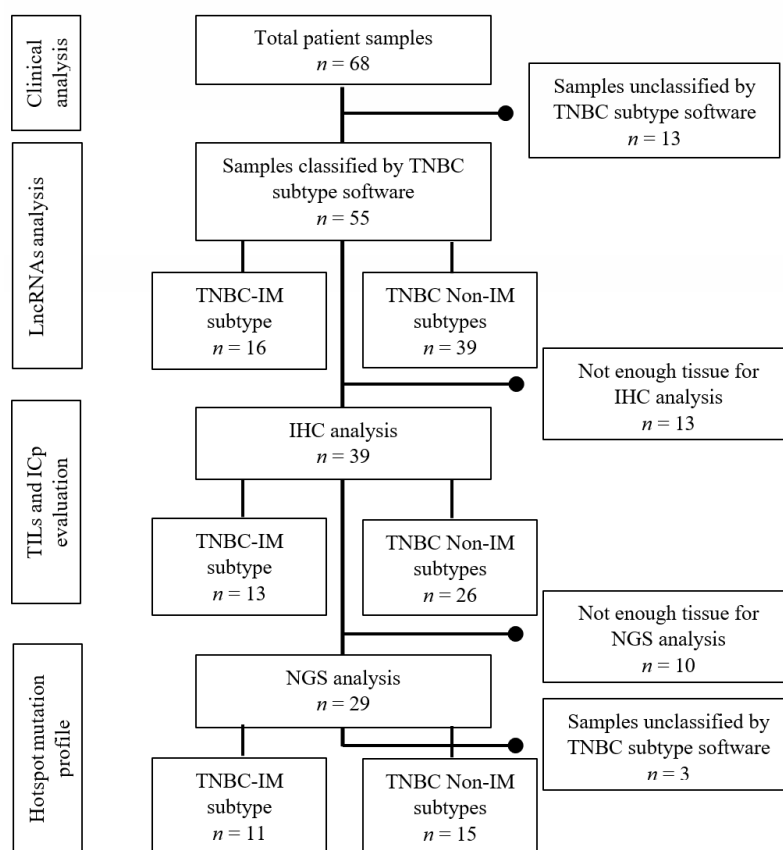

**Figure S2.** Strobe flow diagram. TNBC: Triple negative breast cancer; IM: immunomodulatory; IHC: immunohistochemistry; NGS: next generation sequencing; lncRNAs: long non-coding RNAs (lncRNAs); TILs: Tumor infiltrating lymphocytes; ICp: immune checkpoints.

**Table S1.** Gene content of cancer panel.

| Genes                                                                                                                                                                                                                                                                                                                                                                                                                                                                                                                                                                                                                                                                                                                                                                                                                                                                                                                                                                                                                 |
|-----------------------------------------------------------------------------------------------------------------------------------------------------------------------------------------------------------------------------------------------------------------------------------------------------------------------------------------------------------------------------------------------------------------------------------------------------------------------------------------------------------------------------------------------------------------------------------------------------------------------------------------------------------------------------------------------------------------------------------------------------------------------------------------------------------------------------------------------------------------------------------------------------------------------------------------------------------------------------------------------------------------------|
| <i>AKT1</i> (3), <i>ALK</i> (21–25), <i>BRAF</i> (11, 15), <i>CDK4</i> (2), <i>CDKN2A</i> (1 *, 2, 3), <i>CTNNB1</i> (3), <i>DDR2</i> (18), <i>DICER1</i> (24, 25), <i>EGFR</i> (18–21), <i>ERBB2</i> (8, 17, 20), <i>ERBB4</i> (10, 12), <i>FBXW7</i> (8–12), <i>FGFR1</i> (13, 15), <i>FGFR2</i> (7, 12, 14), <i>FGFR3</i> (7, 9, 14, 16), <i>FOXL2</i> (1 *), <i>GNAI1</i> (4, 5), <i>GNAQ</i> (4, 5), <i>GNAS</i> (8), <i>H3F3A</i> (2 *), <i>H3F3B</i> (2 *), <i>HIST1H3B</i> (1), <i>HRAS</i> (2–4), <i>IDH1</i> (4), <i>IDH2</i> (4), <i>KIT</i> (8–11, 13, 17, 18), <i>KRAS</i> (2–4), <i>MAP2K1</i> (2, 3), <i>MET</i> (2, 14–20), <i>MYOD1</i> (1), <i>NRAS</i> (2–4), <i>PDGFRA</i> (12, 14, 18), <i>PIK3CA</i> (2 *, 3, 6 *, 8, 10, 21), <i>PTPN11</i> (3), <i>RAC1</i> (3), <i>RAF1</i> (7, 10, 12, 13 *, 14 *, 15 *), <i>RET</i> (11, 13, 15, 16), <i>ROS1</i> (38 *, 41 *), <i>SF3B1</i> (15–17), <i>SMAD4</i> (8–12), <i>TERT</i> (promoter *, 1 *, 8 *, 9 *, 13 *), <i>TP53</i> (full coding region) |

Exon number in parentheses, \* Hotspots only.

**Table S2.** Type of recurrence sites of stage III patients ( $n = 57$ ).

| Recurrence                    | %( $n/n$ )   |
|-------------------------------|--------------|
| No                            | 29.8 (17/57) |
| Yes                           | 70.2 (40/57) |
| CNS recurrence                | 43.9 (25/57) |
| Metastases Other Sites no CNS |              |
| Visceral                      | 29.8 (17/57) |
| No Visceral                   | 5.3 (3/57)   |
| Both                          | 14.0 (8/57)  |
| Metastases to Lung            | 36.8 (21/57) |
| Metastases to Liver           | 19.3 (11/57) |
| Metastases to Bone            | 21.1 (12/57) |

CNS: Central Nervous System.

**Table S3.** Differential gene expression analysis coding and long non-coding regions.

| Gene ID                        | LOGFC       | AVEEXPR     | t-Test      | p Value               | ADJ. p Value          | B           |
|--------------------------------|-------------|-------------|-------------|-----------------------|-----------------------|-------------|
| <i>FDCSP</i>                   | 2.943361527 | 6.850946853 | 3.955305312 | 0.000208904           | 0.01170946            | 0.515853226 |
| <i>IGKC</i>                    | 2.24664711  | 7.356507915 | 3.954025916 | 0.000209787           | 0.01173637            | 0.511982038 |
| <i>IGHM</i>                    | 2.231013275 | 6.286047314 | 3.847805474 | 0.000297036           | 0.01551561            | 0.193058658 |
| <i>IGKC</i>                    | 2.123936034 | 8.079436342 | 3.918282083 | 0.000235952           | 0.012891516           | 0.404112859 |
| <i>IGHA1</i>                   | 2.103705005 | 5.952013419 | 4.292874769 | $6.72 \times 10^{-5}$ | 0.005139488           | 1.56053933  |
| <i>IGKC</i>                    | 2.069324519 | 8.551306661 | 4.440568321 | $4.04 \times 10^{-5}$ | 0.003517919           | 2.031150831 |
| <i>IGHG1</i>                   | 2.013379674 | 7.688921093 | 4.268084854 | $7.31 \times 10^{-5}$ | 0.00546486            | 1.482316947 |
| <i>IGHV4-31</i>                | 1.982978135 | 8.208467165 | 4.08699288  | 0.000134883           | 0.008346984           | 0.917983833 |
| <i>IGLV1-44</i>                | 1.981639885 | 3.70740469  | 4.957223829 | $6.45 \times 10^{-6}$ | 0.00092192            | 3.732406847 |
| <i>IGHG1</i>                   | 1.96910446  | 9.086445794 | 4.905015932 | $7.79 \times 10^{-6}$ | 0.001037077           | 3.55701903  |
| <i>IGKC</i>                    | 1.938970572 | 6.809754967 | 4.620531925 | $2.15 \times 10^{-5}$ | 0.002295999           | 2.614586371 |
| <i>CXCL13</i>                  | 1.818226308 | 5.593121881 | 6.145128678 | $7.61 \times 10^{-8}$ | $7.92 \times 10^{-5}$ | 7.871888858 |
| <i>IGLL5</i>                   | 1.785391259 | 10.22665725 | 4.951568066 | $6.59 \times 10^{-6}$ | 0.000931851           | 3.71337264  |
| <i>IGKV<math>\equiv</math></i> | 1.745843704 | 7.592397044 | 4.980519724 | $5.93 \times 10^{-6}$ | 0.000860145           | 3.810894316 |
| <i>CXCL9</i>                   | 1.731316043 | 7.966204912 | 4.261334825 | $7.48 \times 10^{-5}$ | 0.005535427           | 1.461057195 |
| <i>IGKC</i>                    | 1.695100885 | 6.158572658 | 4.898921853 | $7.97 \times 10^{-6}$ | 0.001050526           | 3.536593105 |
| <i>IGKC</i>                    | 1.653521857 | 10.01740769 | 3.907324131 | 0.000244584           | 0.013275411           | 0.3711542   |
| <i>IGKV3D-15</i>               | 1.649032155 | 8.347893953 | 4.799719601 | $1.14 \times 10^{-5}$ | 0.001381514           | 3.205503434 |
| <i>TRAJ17</i>                  | 1.645074727 | 5.680195043 | 5.019889742 | $5.14 \times 10^{-6}$ | 0.000764423           | 3.943849061 |
| <i>IGHG1</i>                   | 1.578146078 | 6.779645809 | 4.255736544 | $7.63 \times 10^{-5}$ | 0.00558278            | 1.443437827 |
| <i>IGLV3-25</i>                | 1.567399741 | 8.841218986 | 3.807293988 | 0.000338748           | 0.017111742           | 0.072741306 |
| <i>CXCL10</i>                  | 1.549755728 | 8.615580185 | 4.207080894 | $9.00 \times 10^{-5}$ | 0.006305284           | 1.290800526 |
| <i>IGK</i>                     | 1.533307511 | 9.65561248  | 4.459600572 | $3.78 \times 10^{-5}$ | 0.003358301           | 2.092347901 |
| <i>GBP4</i>                    | 1.467080145 | 7.179058901 | 4.890195916 | $8.22 \times 10^{-6}$ | 0.001069571           | 3.507363001 |
| <i>IGKC</i>                    | 1.462262791 | 9.112632218 | 4.133286272 | 0.000115473           | 0.007430553           | 1.061031265 |
| <i>YME1L1</i>                  | 1.454346779 | 6.020678752 | 6.511737909 | $1.86 \times 10^{-8}$ | $4.52 \times 10^{-5}$ | 9.187052419 |
| <i>CD38</i>                    | 1.45006825  | 6.098312657 | 5.997847749 | $1.34 \times 10^{-7}$ | $9.73 \times 10^{-5}$ | 7.346951261 |
| <i>IRF4</i>                    | 1.442298063 | 6.352035066 | 5.180562042 | $2.86 \times 10^{-6}$ | 0.000491682           | 4.490319118 |
| <i>FCRL5</i>                   | 1.434365642 | 5.104564812 | 4.892925942 | $8.14 \times 10^{-6}$ | 0.00106385            | 3.516505848 |
| <i>IGHM</i>                    | 1.408334848 | 7.384230397 | 5.363446283 | $1.45 \times 10^{-6}$ | 0.000353343           | 5.119307099 |
| <i>CD79A</i>                   | 1.398772653 | 6.883134059 | 5.902172681 | $1.92 \times 10^{-7}$ | 0.000123025           | 7.007260681 |
| <i>CXCR2P1</i>                 | 1.384830625 | 6.064015095 | 6.05509216  | $1.07 \times 10^{-7}$ | $8.67 \times 10^{-5}$ | 7.550705343 |
| <i>PIM2</i>                    | 1.383637253 | 7.001465215 | 5.567678968 | $6.79 \times 10^{-7}$ | 0.000232898           | 5.829458072 |
| <i>TRAV12-2</i>                | 1.375753055 | 5.361220858 | 5.097362895 | $3.88 \times 10^{-6}$ | 0.00062071            | 4.206589283 |
| <i>YME1L1</i>                  | 1.370614713 | 4.836545567 | 5.825355882 | $2.57 \times 10^{-7}$ | 0.000138742           | 6.735358162 |
| <i>IGHG1</i>                   | 1.351807848 | 5.847076781 | 4.467101487 | $3.68 \times 10^{-5}$ | 0.003291861           | 2.116500313 |
| <i>UBD</i>                     | 1.335481789 | 7.503789199 | 4.853240859 | $9.39 \times 10^{-6}$ | 0.001184665           | 3.383797741 |
| <i>TENT5C</i>                  | 1.334892171 | 7.181763181 | 4.605384024 | $2.27 \times 10^{-5}$ | 0.002378397           | 2.565076177 |
| <i>FAM30A</i>                  | 1.265925483 | 6.835648924 | 5.825294045 | $2.57 \times 10^{-7}$ | 0.000138742           | 6.735139598 |
| <i>IL2RG</i>                   | 1.255929871 | 7.464312792 | 6.776048603 | $6.69 \times 10^{-9}$ | $2.36 \times 10^{-5}$ | 10.14048779 |
| <i>CCL19</i>                   | 1.22677208  | 7.651253468 | 3.861529069 | 0.00028406            | 0.014944919           | 0.233984184 |
| <i>IGLC1</i>                   | 1.219948285 | 7.607714531 | 4.548842393 | $2.77 \times 10^{-5}$ | 0.002734128           | 2.380911705 |
| <i>SLAMF7</i>                  | 1.213199925 | 6.574147652 | 6.280428912 | $4.53 \times 10^{-8}$ | $5.79 \times 10^{-5}$ | 8.356010201 |
| <i>MZB1</i>                    | 1.197273079 | 7.35465191  | 4.944604621 | $6.75 \times 10^{-6}$ | 0.000941908           | 3.689948804 |
| <i>TRAV20</i>                  | 1.165609208 | 3.733066918 | 5.33860379  | $1.60 \times 10^{-6}$ | 0.000360407           | 5.03346172  |
| <i>SLAMF6</i>                  | 1.152327487 | 4.772127079 | 5.888984425 | $2.02 \times 10^{-7}$ | 0.000123025           | 6.960524665 |
| <i>TRAV20</i>                  | 1.130564502 | 5.911463894 | 6.07646435  | $9.90 \times 10^{-8}$ | $8.56 \times 10^{-5}$ | 7.626869084 |
| <i>GBP5</i>                    | 1.118917883 | 6.130462332 | 4.805756945 | $1.11 \times 10^{-5}$ | 0.001366469           | 3.225575643 |
| <i>LAX1</i>                    | 1.114841438 | 5.691522904 | 5.47767354  | $9.51 \times 10^{-7}$ | 0.000269933           | 5.515558511 |
| <i>ANKRD44-IT1</i>             | 1.114619595 | 5.398345928 | 7.186071885 | $1.36 \times 10^{-9}$ | $2.14 \times 10^{-5}$ | 11.62370392 |
| <i>OR6C4</i>                   | 1.099240147 | 6.444723972 | 5.30191346  | $1.83 \times 10^{-6}$ | 0.000394399           | 4.906901709 |
| <i>YME1L1</i>                  | 1.096860683 | 5.04075177  | 4.765745683 | $1.28 \times 10^{-5}$ | 0.001540635           | 3.092743426 |
| <i>YME1L1</i>                  | 1.093800838 | 4.617918367 | 3.811595136 | 0.000334065           | 0.016933924           | 0.085480333 |
| <i>GPR174</i>                  | 1.093060811 | 4.102078365 | 6.292250112 | $4.33 \times 10^{-8}$ | $5.79 \times 10^{-5}$ | 8.398384236 |
| <i>SEL1L3</i>                  | 1.090322848 | 7.044401313 | 5.533272873 | $7.73 \times 10^{-7}$ | 0.000250206           | 5.709297909 |
| <i>CCR2</i>                    | 1.078606635 | 6.115620598 | 5.275981805 | $2.01 \times 10^{-6}$ | 0.000407161           | 4.817619124 |
| <i>VCAM1</i>                   | 1.065525166 | 6.15650004  | 4.501200371 | $3.27 \times 10^{-5}$ | 0.003083731           | 2.226533783 |
| <i>BTG2</i>                    | 1.054206604 | 9.076613637 | 5.35724828  | $1.49 \times 10^{-6}$ | 0.000356297           | 5.097877918 |
| <i>IGKC</i>                    | 1.039223904 | 7.412084324 | 4.303013122 | $6.49 \times 10^{-5}$ | 0.005084913           | 1.592595057 |
| <i>YME1L1</i>                  | 1.037853606 | 6.770696289 | 4.975084582 | $6.05 \times 10^{-6}$ | 0.000872718           | 3.792570132 |
| <i>TRDV2</i>                   | 1.037646389 | 3.670155434 | 5.215321289 | $2.51 \times 10^{-6}$ | 0.000458124           | 4.609318714 |
| <i>MIR142</i>                  | 1.033700489 | 4.774926725 | 4.763015112 | $1.30 \times 10^{-5}$ | 0.001548397           | 3.083694906 |

|                 |             |             |             |                       |                       |             |
|-----------------|-------------|-------------|-------------|-----------------------|-----------------------|-------------|
| <i>CCL5</i>     | 1.033222203 | 7.59358146  | 5.876897681 | $2.12 \times 10^{-7}$ | 0.000123025           | 6.917711683 |
| <i>IFNG</i>     | 1.029312304 | 4.65923508  | 6.399562831 | $2.87 \times 10^{-8}$ | $5.61 \times 10^{-5}$ | 8.783557791 |
| <i>YME1L1</i>   | 1.028751756 | 3.414385854 | 5.601535183 | $5.98 \times 10^{-7}$ | 0.000215255           | 5.94789292  |
| <i>CD2</i>      | 1.027183095 | 7.216852064 | 5.808298453 | $2.74 \times 10^{-7}$ | 0.000138742           | 6.675088041 |
| <i>SLFN12L</i>  | 1.017642293 | 5.541069054 | 6.150462534 | $7.46 \times 10^{-8}$ | $7.92 \times 10^{-5}$ | 7.890941865 |
| <i>IL23A</i>    | 1.013598461 | 5.190110719 | 4.729454739 | $1.46 \times 10^{-5}$ | 0.001689798           | 2.972659022 |
| <i>TRAV12-2</i> | 1.012090486 | 5.930724244 | 4.299928847 | $6.56 \times 10^{-5}$ | 0.005084913           | 1.582839135 |
| <i>ITGAL</i>    | 1.008762873 | 6.514419207 | 6.115592128 | $8.52 \times 10^{-8}$ | $8.28 \times 10^{-5}$ | 7.766432672 |
| <i>IGKC</i>     | 1.008642719 | 5.57773397  | 5.540534135 | $7.52 \times 10^{-7}$ | 0.000249032           | 5.734640302 |
| <i>BCL2A1</i>   | 1.007547625 | 5.561778583 | 4.024974657 | 0.000165882           | 0.009729212           | 0.727703982 |
| <i>YME1L1</i>   | 1.006633651 | 4.265723623 | 4.872486364 | $8.76 \times 10^{-6}$ | 0.001116699           | 3.448102231 |
| <i>CTSS</i>     | 1.005838028 | 7.306051985 | 5.04659995  | $4.66 \times 10^{-6}$ | 0.000708075           | 4.03426944  |

LOFFC: Log Fold chance; AVEEXP: average expression; ADJ: adjusted.

**Table S4.** Clinical and pathological characteristics of TNBC patients with IM and non-IM subtypes.

| Clinical Characteristics | IM                       | Non-IM                   | <i>p</i> -Value |
|--------------------------|--------------------------|--------------------------|-----------------|
|                          | %( <i>n</i> / <i>n</i> ) | %( <i>n</i> / <i>n</i> ) |                 |
| Hormonal Status          |                          |                          |                 |
| Premenopausal            | 73.3(11/15)              | 45.2(19/42)              | -               |
| Postmenopausal           | 26.7(4/15)               | 54.8(23/42)              | 0.057           |
| Vascular Invasion        |                          |                          |                 |
| Yes                      | 66.7(10/15)              | 33.3 (14/42)             | -               |
| No                       | 33.3(5/15)               | 40.4(28/42)              | 0.026 *         |
| PCR                      |                          |                          |                 |
| Yes                      | 45.5(5/11)               | 23.3(7/30)               | -               |
| No                       | 54.5(6/11)               | 76.6(23/30)              | 0.160           |
| Recurrence               |                          |                          |                 |
| Yes                      | 33.3 (5/15)              | 76.2(32/42)              | -               |
| No                       | 66.7 (10/15)             | 23.8 (10/42)             | 0.004 *         |
| Lung Metastases          |                          |                          |                 |
| Yes                      | 0(0/15)                  | 50 (21/42)               | -               |
| No                       | 100 (15/15)              | 50 (21/42)               | <0.001 *        |
| Liver Metastases         |                          |                          |                 |
| Yes                      | 0 (0/15)                 | 26.2 (11/42)             | -               |
| No                       | 100 (15/15)              | 73.8 (31/42)             | 0.023 *         |
| Bone Metastases          |                          |                          |                 |
| Yes                      | 6.7 (1/15)               | 26.2 (11/42)             | -               |
| No                       | 93.3 (14/15)             | 73.8 (31/42)             | 0.106           |
| CNS Metastases           |                          |                          |                 |
| Yes                      | 20 (3/15)                | 47.6 (20/42)             | -               |
| No                       | 80 (12/15)               | 52.4 (22/42)             | 0.022 *         |

Bivariate analysis by chi-square/Fisher exact for the association between the dependent variable (molecular subtypes) and independent variables (clinical and pathological variables). PCR: complete pathological response; CNS: central nervous system; EGFR: epidermal growth factor receptor; \*  $p < 0.05$ .

**Table S5.** Univariate and multivariate analysis with RFS and OS of TNBC patients.

| Variable         | RFS                 |                 |                       |                 | OS                  |                 |                       |                 |
|------------------|---------------------|-----------------|-----------------------|-----------------|---------------------|-----------------|-----------------------|-----------------|
|                  | Univariate Analysis |                 | Multivariate Analysis |                 | Univariate Analysis |                 | Multivariate Analysis |                 |
|                  | HR (95%CI)          | <i>p</i> -value | HR (95% CI)           | <i>p</i> -value | HR (95%CI)          | <i>p</i> -value | HR (95%CI)            | <i>p</i> -value |
| Stage            |                     |                 |                       |                 |                     |                 |                       |                 |
| III              | -                   |                 | -                     |                 | Reference           | -               | -                     |                 |
| IV               |                     |                 |                       |                 | 2.4 (1.2–4.7)       | 0.014 *         |                       |                 |
| Mastectomy       |                     |                 |                       |                 |                     |                 |                       |                 |
| Done             | Reference           | -               | Reference             | -               | Reference           | -               | Reference             | -               |
| Not Done         | 2.7 (1.3–5.5)       | 0.007 *         | 3.6 (1.6–7.7)         | 0.001 *         | 2.3(1.3–4.1)        | 0.004 *         | 1.9(1.1–3.5)          | 0.037 *         |
| Recurrence       |                     |                 |                       |                 |                     |                 |                       |                 |
| No               | Reference           |                 | -                     |                 | Reference           | -               | -                     |                 |
| Yes              | 36.8 (4.9–276.4)    | <0.001 *        |                       |                 | 36.8(4.9–276.4)     | <0.001 *        |                       |                 |
| RT to SNC        |                     |                 |                       |                 |                     |                 |                       |                 |
| No               | Reference           | -               | -                     | -               | Reference           | -               | Reference             | -               |
| Yes              | 3.73 (1.9–7.3)      | <0.001 *        | 2.6 (1.3–5.5)         | 0.007 *         | 3.5(1.9–6.3)        | <0.001 *        | 2.4(1.3–4.5)          | 0.008 *         |
| Metastasis       |                     |                 |                       |                 |                     |                 |                       |                 |
| None             | Reference           | -               |                       |                 | Reference           | -               |                       |                 |
| Visceral         | 3.2 (1.5–6.8)       | 0.004 *         |                       |                 | 2.6 (1.4–5.1)       | 0.004 *         |                       |                 |
| Non Visceral     | 3.7 (1.03–13.5)     | 0.045 *         | -                     |                 | 1.9 (0.5–6.5)       | 0.328           | -                     |                 |
| Both             | 3.3 (1.2–9)         | 0.019 *         |                       |                 | 2.9(1.2–7.1)        | 0.017 *         |                       |                 |
| Immunomodulator  |                     |                 |                       |                 |                     |                 |                       |                 |
| Non-IM           | Reference           | -               | Reference             | -               | Reference           | -               | Reference             | -               |
| IM               | 0.3 (0.1–0.8)       | 0.011 *         | 0.3 (0.1–0.9)         | 0.031 *         | 0.3(0.1–0.7)        | 0.007 *         | 0.4(0.2–0.9)          | 0.038 *         |
| Bone Metastasis  |                     |                 |                       |                 |                     |                 |                       |                 |
| No               | Reference           | -               |                       |                 | Reference           | -               | -                     |                 |
| Yes              | 2.01 (0.96–4.24)    | 0.065           | -                     |                 | 1.6 (0.9–3)         | 0.124           |                       |                 |
| Lung Metastases  |                     |                 |                       |                 |                     |                 |                       |                 |
| No               | Reference           | -               |                       |                 | Reference           | -               | -                     |                 |
| Yes              | 1.91 (1–3.7)        | 0.054           | -                     |                 | 2.2 (1.2–3.8)       | 0.007 *         |                       |                 |
| Liver Metastases |                     |                 |                       |                 |                     |                 |                       |                 |
| No               | Reference           | -               |                       |                 | Reference           | -               | -                     |                 |
| Yes              | 1.8 (0.84–3.83)     | 0.13            | -                     |                 | 2.3(1.3–4.1)        | 0.006 *         |                       |                 |
| CNS Metastases   |                     |                 |                       |                 |                     |                 |                       |                 |
| No               | Reference           | -               |                       |                 | Reference           | -               | -                     |                 |
| Yes              | 4.74 (2.3–9.8)      | <0.001 *        | -                     |                 | 4.5 (2.3–8.5)       | <0.001 *        |                       |                 |

TNBC: Triple negative breast cancer; rfs: recurrence-free survival; OS: overall survival (OS); HR: hazard ratio; RT: radiotherapy; CNS: central nervous system; IM: immunomodulatory (IM); \*  $p < 0.05$ .

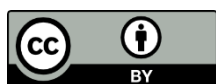

© 2021 by the authors. Licensee MDPI, Basel, Switzerland. This article is an open access article distributed under the terms and conditions of the Creative Commons Attribution (CC BY) license (<http://creativecommons.org/licenses/by/4.0/>).
